# Supplementary material for: Accelerated invagination of vacuoles as a stress response in chronically heat-stressed yeasts
Source: PubMed Central journal article supplement (PMC5805771; doi:10.1038/s41598-018-20781-8), 2018-02-08
Supplement: 41598_2018_20781_MOESM1_ESM.pdf [file 41598_2018_20781_MOESM1_ESM.pdf]

## Supplementary methods, figures and table

### Accelerated invagination of vacuoles as a stress response in chronically heat-stressed yeasts

Ayane Ishii<sup>a</sup>, Masahito Kawai<sup>a</sup>, Haruka Noda<sup>a</sup>, Hiroyuki Kato<sup>b</sup>, Kohei Takeda<sup>a</sup>, Kotomi Asakawa<sup>b</sup>, Yoshinobu Ichikawa<sup>b</sup>, Tomohiro Sasanami<sup>a</sup>, Keiji Tanaka<sup>c</sup>  
and Yoko Kimura<sup>a,b,#</sup>

<sup>a</sup>Graduate School of Integrated Science and Technology, Shizuoka University, Shizuoka, 422-8529, Japan.

<sup>b</sup>Department of Agriculture, Shizuoka University, Shizuoka, 422-8529, Japan.

<sup>c</sup>Laboratory of Protein Metabolism, Tokyo Metropolitan Institute of Medical Science, Setagaya-ku, Tokyo, 113-8613, Japan.

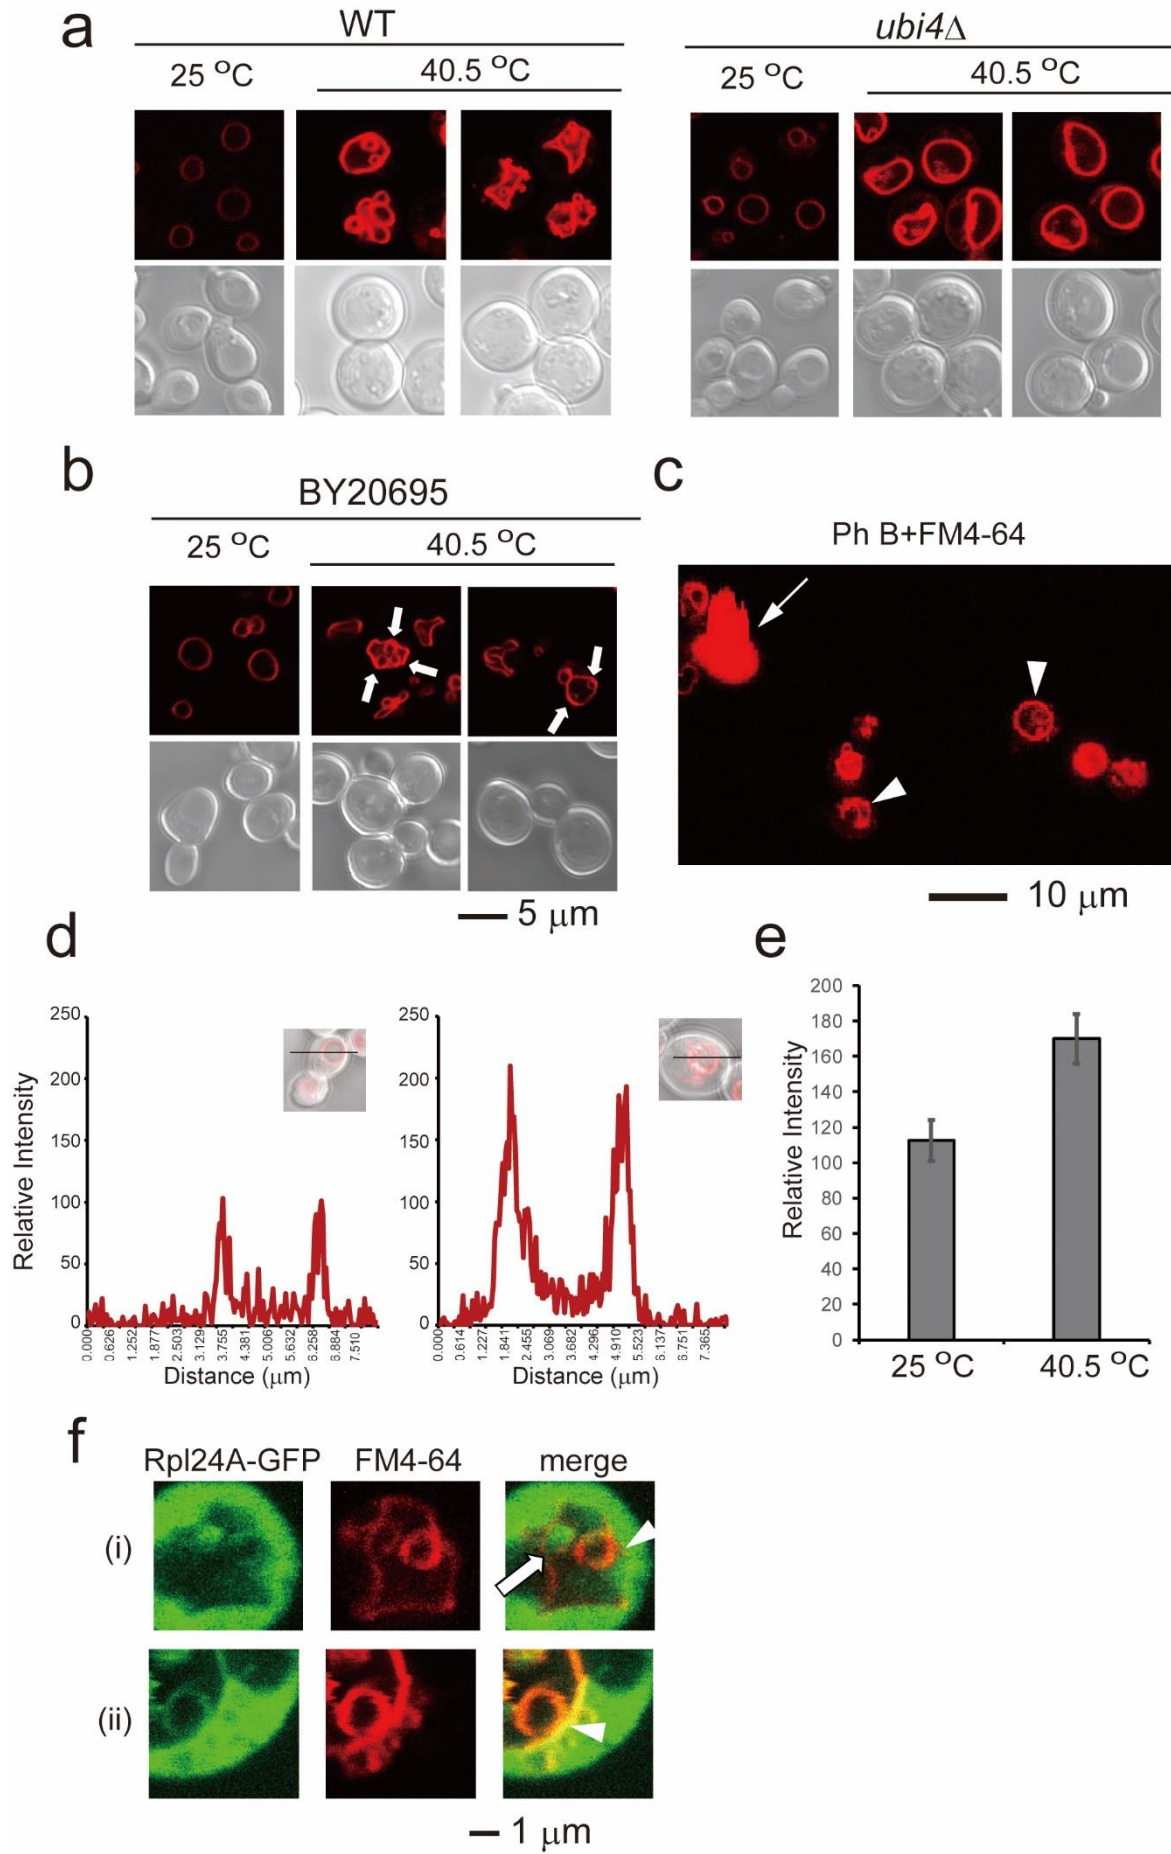

Supplementary Figure 1. FM4-64 staining

(a). FM4-64 stained cells with equal degree of contrast adjustments of images between the cells grown at 25°C and 40.5°C for 6 h in Figure 2a. (b) FM4-64 staining of strain BY20695 cells grown at 25°C and 40.5°C for 6 h. Arrows indicate vesicle-like structures. (c). FM4-64 and Phloxine B double staining of wild-type cells grown at 40.5°C for 6 h. The arrow indicates both Phloxine-B and FM4-64 stained cells, and the arrowheads indicate FM4-64 stained cells with vesicle-like structures. Scale bar, 10  $\mu$ m. (d). Line scan of FM4-64 fluorescence across the wild-type cells at 25°C (left) and 40.5°C for 6 h (right). Representative scan profiles are shown. (e) Quantification of FM4-64 in (d). Mean value of a max peak intensity of ten vacuolar membranes and error bar (SE) is shown. (f). (From Figure 1d). Representatives of vesicle-like structures with FM4-64 contour and GFP fluorescence inside, and structures with both FM4-64 and GFP contours, and they are indicated by arrow and arrowhead, respectively.

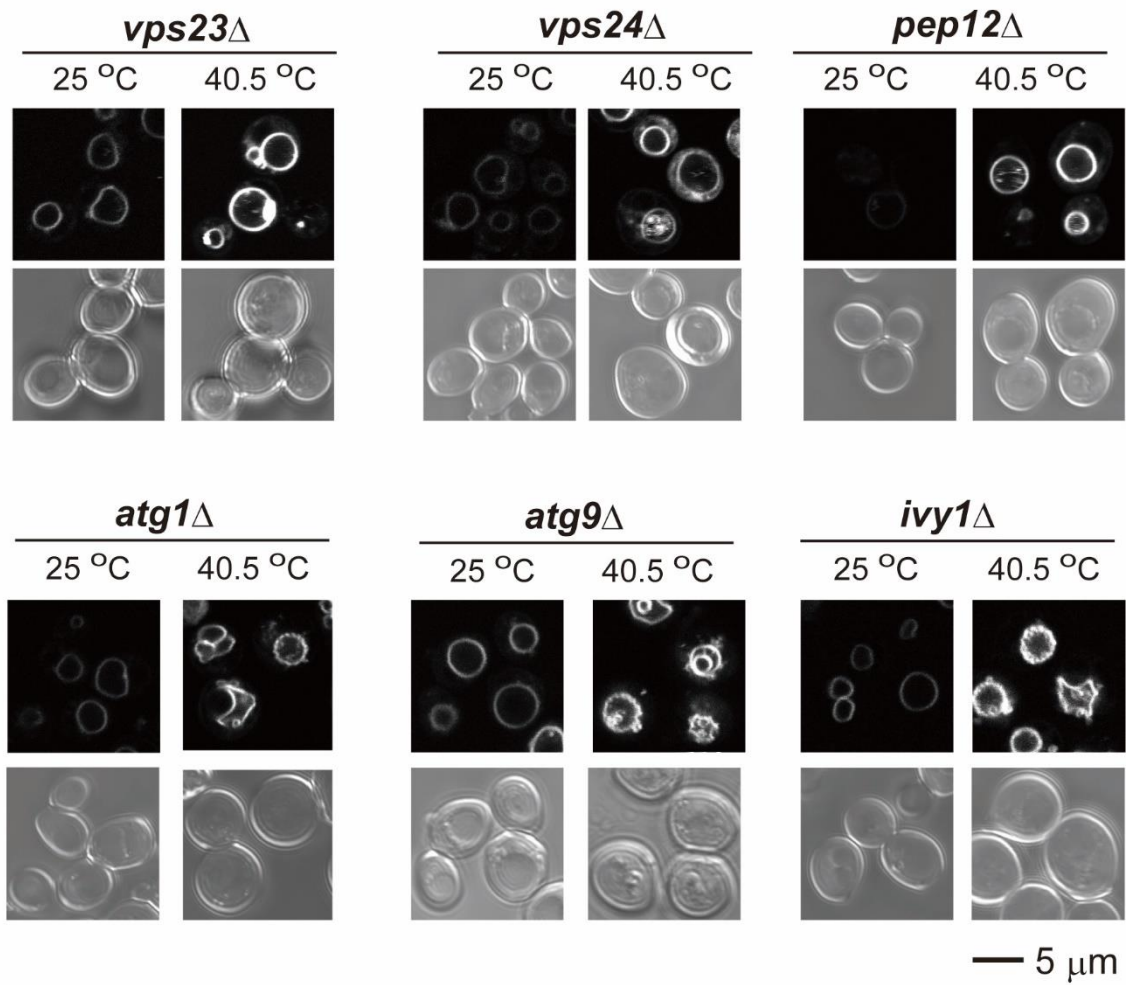

Supplementary Figure 2.

FM4-64 stained cells of various mutants with equal contrasts

FM4-64 stained cells of various mutants with equal contrasts for cells grown at 25°C and 40.5°C in Fig. 3b.

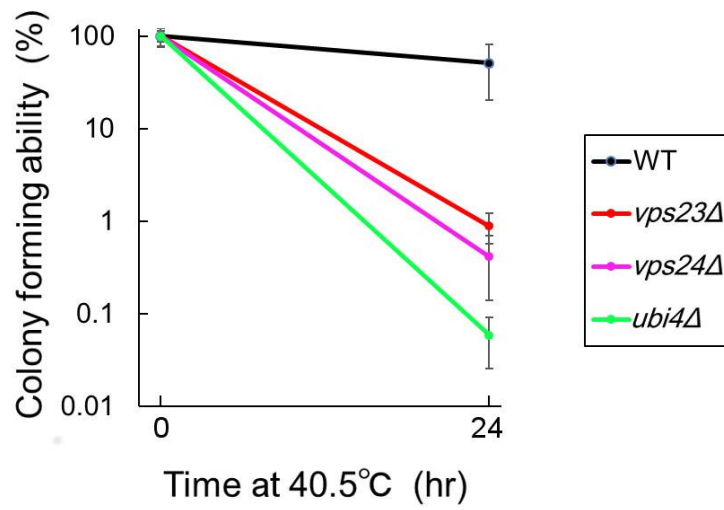

Supplementary Figure 3.

#### Colony forming abilities

Colony forming abilities of wild-type,  $\Delta ubi4$ ,  $\Delta vps23$  and  $\Delta vps24$  cells grown at 40.5°C for 24 h. Percentage viabilities by comparing the number at the starting time are shown. Results are mean value of three independent experiments. Error bar indicates SE. The viability of *pep12Δ* cells was not examined.

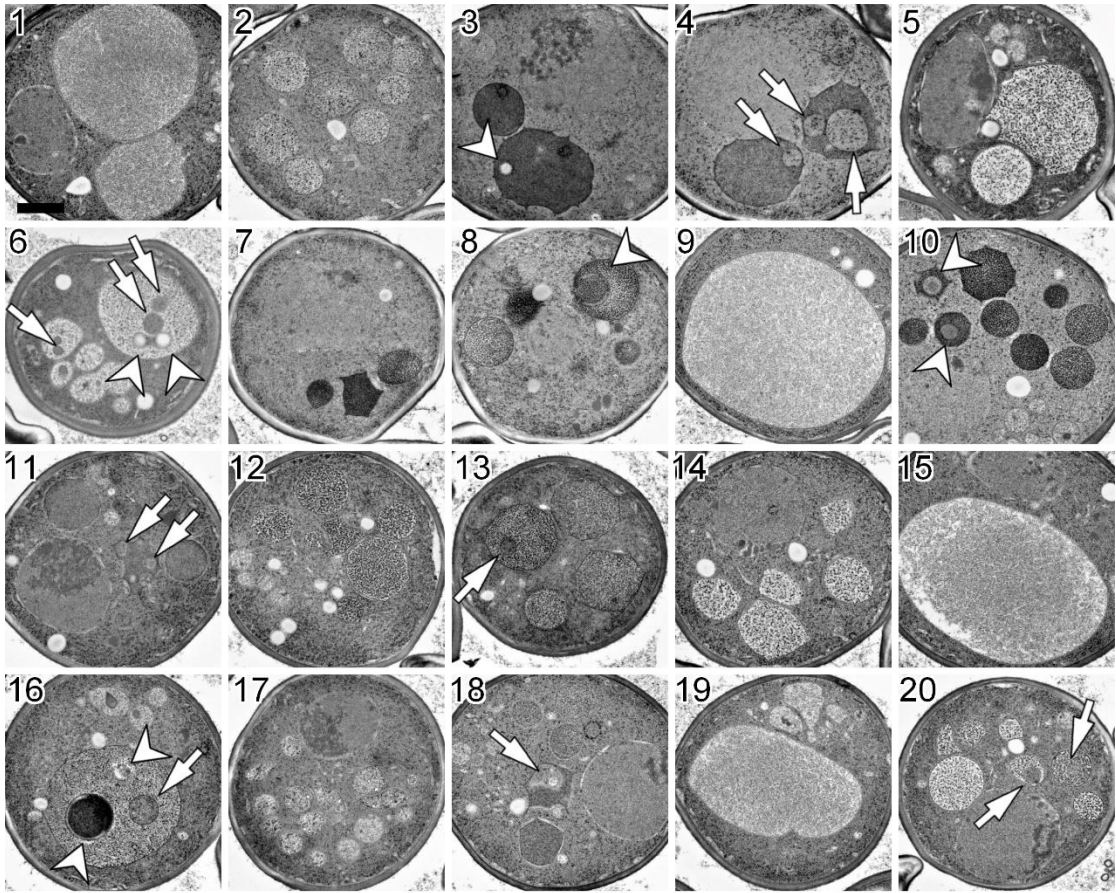

Supplementary Figure 4.

Electron microscopic analysis of wild-type cells grown at 40.5°C for 6 h

Fifty-two images were randomly taken, and of these, twenty representative cells to show the overall population, are shown. Arrows and arrow-heads indicate cytoplasmic-like and non-cytoplasmic vesicle-like structures, respectively, as judged from the existence of ribosome-like structures. Scale bar, 1  $\mu\text{m}$ .

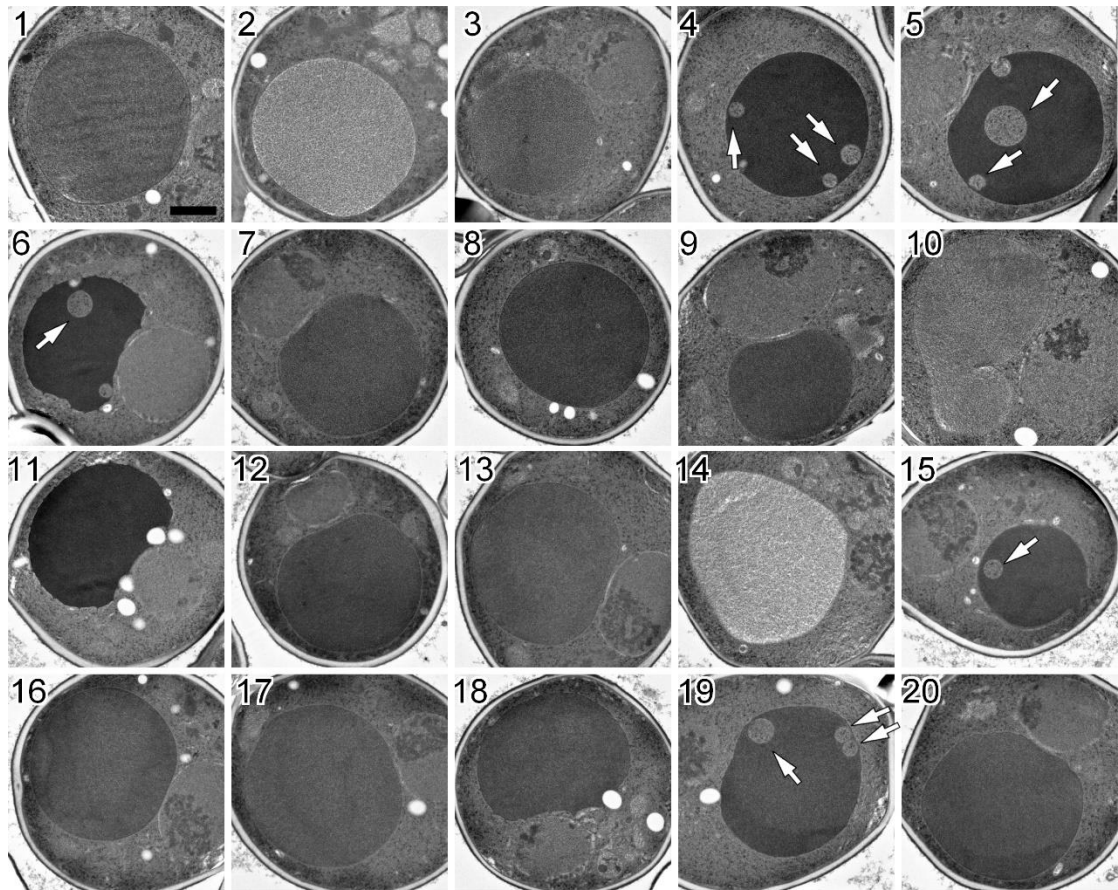

Supplementary Figure 5.

Electron microscopic analysis of *ubi4* $\Delta$  cells grown at 40.5°C for 6 h

Fifty images were randomly taken, and of these, twenty representative cells to show the overall population, are shown. Arrows indicate cytoplasmic vesicle-like structures. Scale bar, 1  $\mu$ m.

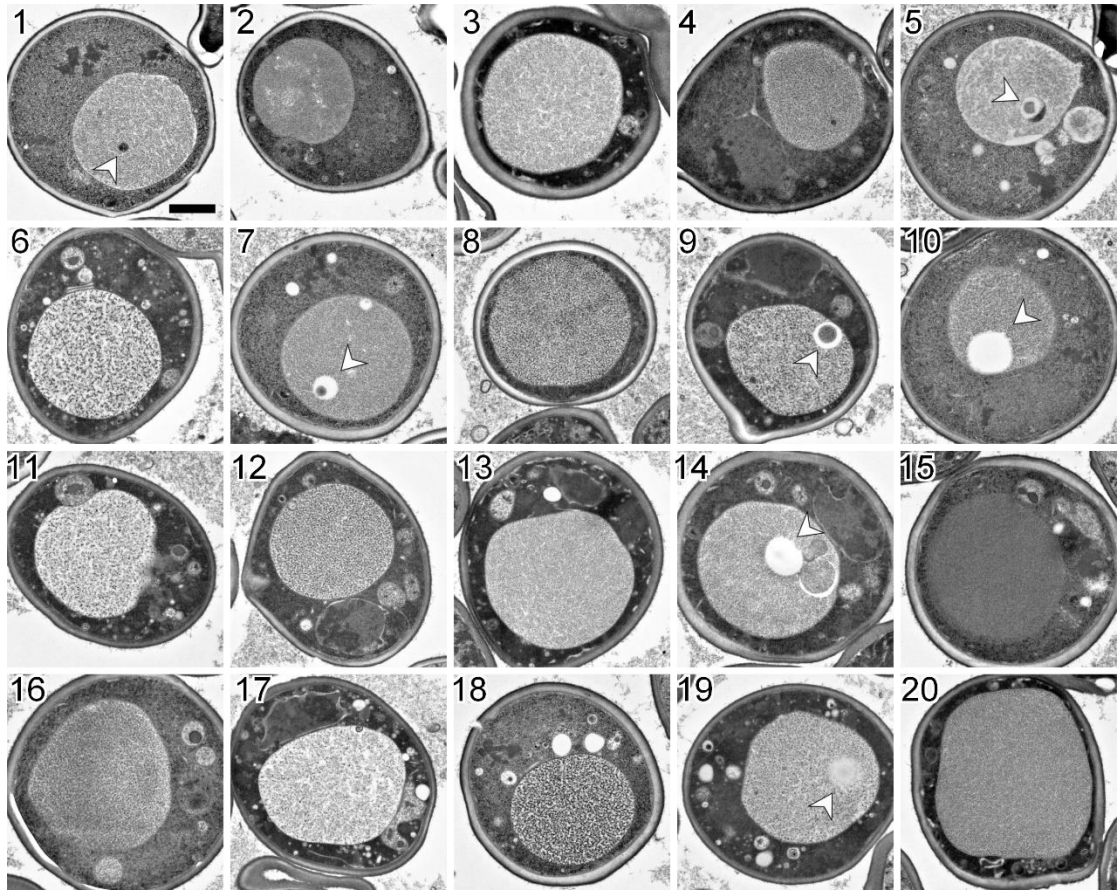

Supplementary Figure 6.

Electron microscopic analysis *vps23* $\Delta$  cells grown at 40.5°C for 6 h

Twenty cells are shown. Cells which appeared to be dying were not chosen. Arrow-heads indicate unidentified vesicle-like structures. Scale bar, 1  $\mu$ m.



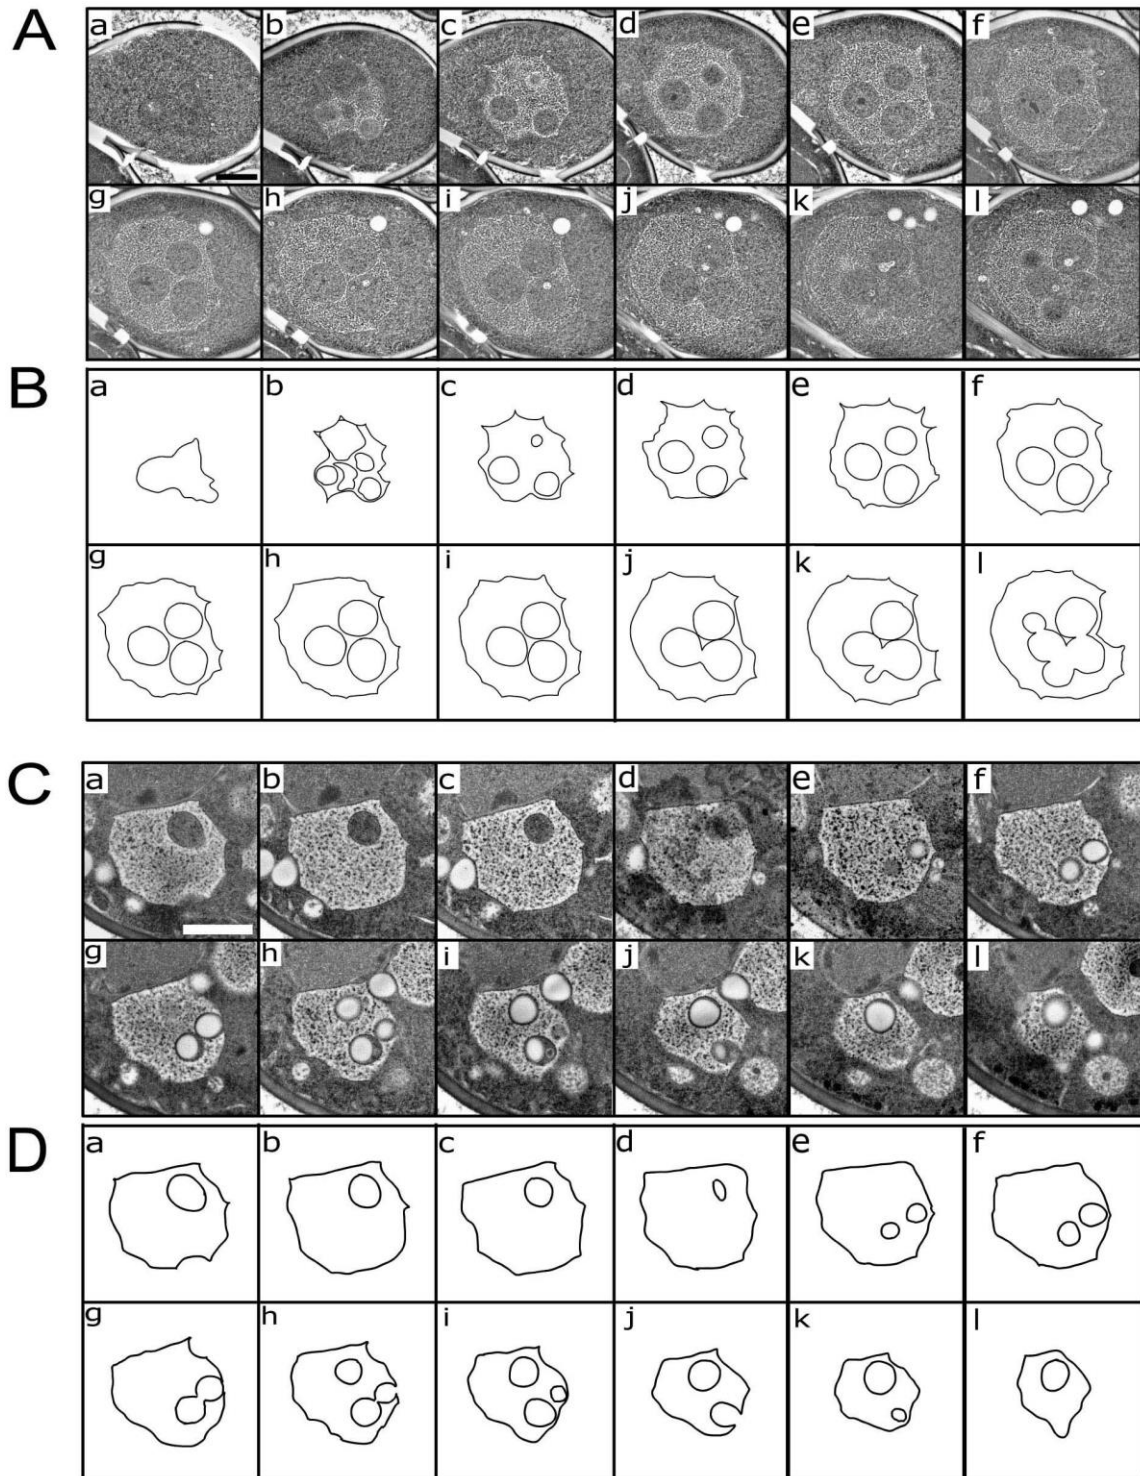

Supplementary Figure 7.

Serial sections of electron micrographs

Electron micrographs (A and C) and their traces (B and D) generated from 80-nm-thin serial sections of wild-type cells grown at 40.5°C for 6 h. Scale bar, 1  $\mu$ m.

Supplementary Video 1. Three-dimensional reconstructions of EM images in Fig. 6a

Supplementary Video 2. Three-dimensional reconstructions of traces of EM images in Fig. 6b

Supplementary Video 3. Flip images of Fig. 6a

Supplementary Video 4. Three-dimensional reconstructions of EM images in Fig. 6c

Supplementary Video 5. Three-dimensional reconstructions of traces of EM images in Fig. 6d

Supplementary Video 6. Flip images of Fig. 6c

| Name          | Genotype                                                                                                                            | Source/Reference |
|---------------|-------------------------------------------------------------------------------------------------------------------------------------|------------------|
| W303a         | MAT <sub>a</sub> <i>ade2-1 can1-100 his3-12,16 leu2-3,112 trp1-1 ura3-1</i>                                                         | Rothstein        |
| W303 $\alpha$ | MAT $\alpha$ <i>ade2-1 can1-100 his3-12,16 leu2-3,112 trp1-1 ura3-1</i>                                                             | Rothstein        |
| Y914          | W303a <i>ubi4<math>\Delta</math>::KanMX</i>                                                                                         | This study       |
| US256         | W303a <i>RPL24A-GFP::his3MX</i>                                                                                                     | Ushimaru         |
| Y1309         | W303a <i>RPL24A-GFP::his3MX, pep4<math>\Delta</math>::KanMX</i>                                                                     | This study       |
| Y1323         | W303a <i>atg1<math>\Delta</math>::KanMX</i>                                                                                         | This study       |
| Y1273         | W303a <i>atg9<math>\Delta</math>::KanMX</i>                                                                                         | Ushimaru         |
| Y995          | W303a <i>vps23<math>\Delta</math>::KanMX</i>                                                                                        | This study       |
| Y1287         | W303a <i>vps24<math>\Delta</math>::KanMX</i>                                                                                        | This study       |
| Y1375         | W303a <i>ivy1<math>\Delta</math>::KanMX</i>                                                                                         | This study       |
| ScHY-2445     | SEY6210 MAT $\alpha$ <i>VPH1-GFPny::KanMX</i>                                                                                       | Ohsumi           |
| Y1285         | SEY6210 MAT $\alpha$ <i>VPH1-GFPny::Hyg</i>                                                                                         | This study       |
| Y1288         | SEY6210 MAT $\alpha$ <i>VPH1-GFPny::Hyg ubi4<math>\Delta</math>::KanMX</i>                                                          | This study       |
| Y1290         | SEY6210 MAT $\alpha$ <i>VPH1-GFPny::Hyg, <math>\Delta</math>vps23::KanMX</i>                                                        | This study       |
| Y1320         | SEY6210 MAT $\alpha$ <i>VPH1-GFPny::KanMX, pep4<math>\Delta</math>::HIS3</i>                                                        | This study       |
| Y1229         | W303a <i>LYP1-3HA::TRP1</i>                                                                                                         | This study       |
| Y1231         | W303a <i>LYP1-3HA::TRP1, ubi4<math>\Delta</math>::KanMX</i>                                                                         | This study       |
| Y1278         | W303a <i>HXT3-3HA::TRP1</i>                                                                                                         | This study       |
| Y1280         | W303a <i>HXT3-3HA::TRP1, ubi4<math>\Delta</math>::KanMX</i>                                                                         | This study       |
| BY20695       | MAT $\alpha$ <i>his3<math>\Delta</math>1, leu2<math>\Delta</math>0, met15<math>\Delta</math>&amp;Delta;ura3<math>\Delta</math>0</i> | NBRP             |
| Y1131         | BY20695 <i>ubi4<math>\Delta</math>::KanMX</i>                                                                                       | This study       |
| BY4741        | MAT <sub>a</sub> <i>his3<math>\Delta</math>1, leu2<math>\Delta</math>0, met15<math>\Delta</math>0, ura3<math>\Delta</math>0</i>     | Euroscarf        |
| pep12         | BY4741 <i>pep12<math>\Delta</math>::KanMX4</i>                                                                                      | Euroscarf        |

Supplementary Table 1  
Strains used in this study
